# Supplementary material for: Indirect Macrophage Responses to Ionizing Radiation: Implications for Genotype-Dependent Bystander Signaling
Source: Oxford University Press journal article supplement (doi:10.1158/0008-5472.can-07-3050), 2008-01-15
Supplement: 00085472can073050-sup-supplemental_table_3.xls [file 00085472can073050-sup-supplemental_table_3.xls]

## Sheet: Sheet1
Affymetrix expresson values and fold-changes in expression of p53-target genes in bone marrow-derived macrophages form C57BL/6 or CBA/Ca mice. Cells were collected 6 hours after sham-irradiation (control) or after exposeure to 4Gy ionizing radiation (6hr). Fold changes and the upper and lower 90% confidence intervals are shown for each strain separately.
Gene	Accession No	C57BL/6 Control	SEM	C57BL/6 6hr	SEM	Lower boundary	Upper boundary	CBA/Ca Control	SEM	CBA/Ca 6hr	SEM	Lower boundary	Upper boundary
Bcl-2	BM119782	112.91	5.18	118.99	5.22	0.95	1.17	42.4	8.86	57.63	5.28	0.97	2.11
Bcl-2	NM_009741	115.54	12.39	113.43	8.86	-0.81	-1.26	81.17	11.92	80	16.57	-0.68	-1.62
PTEN	AA214868	864.74	20.01	789.86	11.62	-1.05	-1.14	493.93	23.6	771.2	8.59	1.44	1.7
PTEN	AA214868	440.01	25.85	441.37	8.59	0.91	1.12	533.86	18.59	541.79	14.21	0.95	1.09
14-3-3s	NM_018754	223.1	11.99	144.09	27.11	-1.16	-2.26	261.47	15.24	159.9	8.9	-1.43	-1.87
Reprimo	NM_023396	66.83	4.71	58.49	5.18	-0.95	-1.38	59.97	3.49	68.32	4.82	0.98	1.32
PERP	NM_022032	20	0	20	0	1	1	25.67	1.49	20	0	-1.28	-1.28
PUMA	AW489168	207.76	11.05	254.43	18.38	1.05	1.42	225.05	12.1	205.64	11.29	-0.96	-1.24
Noxa	NM_021451	193.44	6.08	216.4	15.03	0.98	1.26	178.58	22.3	227.82	8.76	1.05	1.62
Scotin	BC010238	2607.8	53.28	2711.75	48.77	0.99	1.09	3132.22	33.23	2606.57	58.39	-1.15	-1.25
Pidd	NM_022654	137.87	8.85	149.51	3.3	0.97	1.22	101.04	8.22	103.02	7.25	0.86	1.22
KILLER/DR5	NM_020275	38.41	7.3	41.44	3.94	0.78	1.61	31.8	5.92	38	6	0.8	1.84
KILLER/DR5	NM_020294	58.64	7.61	51.25	5.97	-0.85	-1.53	41.77	6.15	41	9.16	-0.67	-1.69
Bax	BC018228	1266.1	40.33	1090.96	25.32	-1.09	-1.24	841.17	21.95	1094.14	39.04	1.21	1.4
Fas	NM_007987	50.48	7.6	58.46	6.21	0.86	1.6	120.76	5.45	174.11	3.44	1.33	1.57
mdm2	AK004719	1375.51	7.9	2311.87	20.93	1.65	1.71	1072	32.33	1803.48	18.44	1.6	1.77
mdm2	X58876	658.62	12.66	849	18.13	1.23	1.35	383.21	22.2	814.94	13.75	1.93	2.36
CDKN1A	AK007630	980.28	35.13	2268.22	31.6	2.18	2.47	1061.19	52.1	2377.07	39.41	2.06	2.45
CDKN1A	NM_007669	215.36	16.53	355.59	10.55	1.45	1.9	165.86	22.39	478.99	16.71	2.34	3.73
