# Supplementary material for: Indirect Macrophage Responses to Ionizing Radiation: Implications for Genotype-Dependent Bystander Signaling
Source: Oxford University Press journal article supplement (doi:10.1158/0008-5472.can-07-3050), 2008-01-15
Supplement: 00085472can073050-sup-table_1.xls [file 00085472can073050-sup-table_1.xls]

## Sheet: Sheet1
Differentially expressed gene probe sets (p<0.05 using FDR)
Probe set	Accession	Gene	C57BL/6 mean	C57BL/6 SE	CBA/Ca mean	CBA/Ca SE	fold change	paired P value
1417461_at	NM_007598	adenylate cyclase-associated protein 1	120.84	50.89	6743.6	127.37	55.81	2.7e-05
1417462_at	NM_007598	adenylate cyclase-associated protein 1	75.17	23.95	4136.36	147.55	55.03	0.000103
1417976_at	NM_007398	adenosine deaminase; Ada	73.17	9.81	2693.95	58.61	36.82	2.6e-05
1448211_at	NM_133764	NM_133764.1	43.71	13.88	666.76	30.86	15.25	0.000487
1457088_at	BB780781	est BB780781	20	0	259.88	28.72	12.99	0.003596
1426787_at	AW744519	AW744519	154.18	12.33	1860.45	210.22	12.07	0.003724
1419601_at	AF322631	potassium inwardly-rectifying channel J10; Kcnj10	35.51	23.12	416.05	93.21	11.72	0.028868
1428604_at	AK011986	AK011986.1	20	0	224.15	36.73	11.21	0.011485
1425413_at	BC017598	regulatory factor X, 3; rfx3	20	0	214.45	17.16	10.72	0.001475
1445597_s_at	BB404920	HRAS like suppressor 3; hrasls3	26.14	13.23	248.61	17.3	9.51	0.001893
1447901_x_at	BB169770	BB169770	80.28	10.79	759.7	97.22	9.46	0.004848
1451533_at	BC022687	BC022687	115.57	6.76	1083.81	63.78	9.38	0.000666
1447227_at	AI504711	est AI504711	80.48	57.93	730.83	104.37	9.08	0.006167
1458719_at	BM233846	est BM233846	47.63	13.87	389.51	17.99	8.18	0.000655
1429831_at	BI684288	phosphoinositide-3-kinase adaptor protein 1	323.47	48.47	2482.06	155.35	7.67	0.000572
1456857_at	BB782615	est BB782615	95.08	16.17	629.25	32.8	6.62	0.000591
1450876_at	AI987976	complement component factor h	82.53	29.45	535.87	96.87	6.49	0.008579
1418456_a_at	AF252873	chemokine (C-X-C motif) ligand 14; Cxcl14	87.68	21.31	531.35	34.15	6.06	0.001556
1423569_at	AW108522	glycine amidinotransferase (L-arginine:glycine amidinotransferase)	170.31	20.37	1002.52	91.49	5.89	0.002247
1449498_at	NM_010766	Marco	236.35	25.89	1393.01	182.02	5.89	0.007228
1424940_s_at	BC022687	BC022687	177.86	35.73	991.16	59.98	5.57	0.001203
1455869_at	BG862223	BG862223	35.98	12.16	198.89	46.07	5.53	0.049807
1419693_at	NM_130449	Collectin 12	418.61	35.16	2231.09	97.72	5.33	0.000166
1434709_at	BB202655	L1 cell adhesion molecule	134.89	18.41	675.3	22.66	5.01	0.000495
1434875_a_at	AV018952	high mobility group nucleosomal binding domain 3	114.53	12.54	553.31	69.76	4.83	0.010158
1435415_x_at	BB491008	MARCKS-like protein	309.68	44.93	1491.06	260.44	4.81	0.015792
1428692_at	AW259452	AK004078.1	51.61	11.87	246.11	21.87	4.77	0.003039
1437226_x_at	AV110584	MARCKS-like protein	397.48	55.75	1842.91	358.24	4.64	0.019172
1415922_s_at	NM_010807	MARCKS-like protein	450.56	65.13	2050.83	360.98	4.55	0.014167
1423626_at	BB150886	dystonin	52	9.31	234.6	25.3	4.51	0.007406
1435627_x_at	AV215438	MARCKS-like protein	361.15	47.46	1594.35	259.91	4.41	0.013485
1428861_at	AK019472	DOC1	86.88	15.59	375	33.88	4.32	0.003663
1451240_a_at	BC024663	glyoxalase 1	327.62	21.6	1407.53	73.1	4.3	0.000443
1429189_at	BI440651	arylsulfatase B	704.91	42.25	2998.74	102.23	4.25	0.000355
1427943_at	BI730288	acylphosphatase 2, acyp2	40.67	11.4	167.87	14.18	4.13	0.00735
1440879_at	AW046072	ABC transporter sub-family A member 9	42.25	14.11	174.33	32.22	4.13	0.02185
1423153_x_at	AI987976	complement component factor h	254.11	49.85	1043.69	152.27	4.11	0.006825
1422160_at	L22338	MHC (H-2T24)	42.14	10.65	172.47	17.19	4.09	0.003721
1448710_at	D87747	chemokine (C-X-C motif) receptor 4; cxcr4	1121.04	240.28	4587.32	368.31	4.09	0.005322
1455697_at	BQ175938	est BQ175938	75.31	13.76	305.42	16.53	4.06	0.002041
1422128_at	NM_025974	ribosomal protein L14	176.64	21.78	708.97	21.55	4.01	8.1e-05
1444206_at	BB121580	est BB121580	100.35	33.97	401.57	22.36	4	0.007445
1425435_at	L04274	macrophage scavenger receptor 1; msr1; SR-A	153.21	23.65	610.25	22.54	3.98	0.000663
1418701_at	NM_007744	catechol-O-methyltransferase	538.49	39.45	2137.01	102.44	3.97	0.001271
1424108_at	BC024663	glyoxalase 1	301.05	24.25	1177.05	43.35	3.91	0.000453
1427153_at	AW047304	branched chain ketoacid dehydrogenase E1, beta polypeptide	74.82	13.39	290.75	20.41	3.89	0.001576
1449347_a_at	NM_021365	X-linked lymphocyte-regulated 4	117.94	19.21	458.76	40.21	3.89	0.002826
1448786_at	NM_025806	NM_025806.1	152.24	32.56	573.97	103.34	3.77	0.032503
1431777_a_at	AK002970	high mobility group nucleosomal binding domain 3	134.15	19.6	502.73	44.36	3.75	0.006174
1430302_at	AK019934	AK019934	225.08	48.19	820.01	124.47	3.64	0.030785
1418671_at	BC014767	calpain 5	170.19	28.36	608.79	27.52	3.58	0.000935
1433933_s_at	BB553107	solute carrier organic anion transporter family, member 2b1	67.1	10.73	239.6	49.93	3.57	0.028611
1427512_a_at	X84014	laminin, alpha 3	41.22	10.88	146.88	13.35	3.56	0.009518
1460063_at	BB230617	Chr 5, ERATO Doi 798	31.72	9.34	113	18.37	3.56	0.024771
1428452_at	AK012812	AK012812.1	66.75	14.61	232.58	15.82	3.48	0.004912
1428778_at	AK019095	cysteine-rich motor neuron 1	90.43	17.44	313.89	51.55	3.47	0.004583
1452253_at	AK018666	SFI-1	110.23	11.09	382.08	27.28	3.47	0.012504
1455995_at	BB125269	BB125269	245.15	62.83	851.57	79.29	3.47	0.009224
1450170_x_at	NM_010380	MHC (H2-D1)	2585.82	710.59	8942.51	276.35	3.46	0.003874
1451490_at	BC027340	lysophospholipase-like 1	143.59	19.21	496.38	18.24	3.46	0.000692
1457259_at	AV023631	est AV023631	193.83	12.27	666.58	31.47	3.44	0.001221
1439241_x_at	BB825787	steroid 5 alpha-reductase 2-like	239.89	67.99	816.85	42.14	3.41	0.005063
1447531_x_at	BB387556	CUG binding protein 2	199.76	27.74	681.48	28.78	3.41	0.001319
1449331_a_at	NM_009023	receptor-associated protein of the synapse (Rapsn)	229.06	42.42	771.79	47.35	3.37	0.004145
1417378_at	NM_018770	Igsf4	414.61	31.04	1389.72	106.07	3.35	0.003868
1428700_at	AK008013	Vpurinergic receptor P2Y, G-protein coupled 13	103.61	14.16	344.69	35.57	3.33	0.012797
1418829_a_at	NM_013509	enolase 2	309.82	42.24	1027.48	109.15	3.32	0.005489
1418204_s_at	NM_019467	allograft inflammatory factor 1; Aif1	246.98	32.43	815.44	138.75	3.3	0.033315
1437473_at	AV284857	v-maf oncogene	237.7	55.43	782.06	68.21	3.29	0.009682
1437992_x_at	BB039269	gap junction membrane channel protein alpha 1 Gja1	40.54	5.32	133.15	27.59	3.28	0.034072
1423586_at	AA500897	AXL receptor tyrosine kinase	56.46	10	183.8	26.91	3.26	0.017796
1455215_at	AU067746	AU067746	347.98	31.35	1128.98	62.91	3.24	0.001047
1429190_at	BI440651	Arylsulfatase B	68.14	14.4	219.62	19.32	3.22	0.005032
1452431_s_at	AF119253	MHC H2-Ea	175.6	22.63	563.39	97.96	3.21	0.024692
1424412_at	BE650508	Opioid growth factor receptor-like 1	193.44	29.94	617.67	58.39	3.19	0.006046
1450344_a_at	NM_011196	prostaglandin E receptor 3 (subtype EP3) Ptger3	37.42	8.25	118.85	11.53	3.18	0.012388
1440281_at	BB387483	BB387483	55.46	12.93	175.27	15.33	3.16	0.005512
1450454_at	NM_023141	ATP-dependant interferon responsive (Adir)/Tor3a	142.29	13.67	447.65	28.16	3.15	0.001655
1456518_at	BG068263	BG068263	83	12.06	259.71	39.13	3.13	0.01817
1431611_a_at	AK013775	Igsf4	66.39	14.13	206.87	11.03	3.12	0.00439
1451611_at	BC024581	Hrasls3	140.16	22.75	437.21	34.09	3.12	0.00248
1453473_a_at	BG094946	Dynein light chain	1528.36	86.97	4755.91	75.4	3.11	6.5e-05
1418148_at	NM_021304	lung alphabeta hydrolase 1 (Labh1-pending)	78.35	19.36	240.32	17.18	3.07	0.007288
1415997_at	AF173681	thioredoxin interacting protein txnip	757.24	88.93	2315.08	423.95	3.06	0.043939
1419515_at	NM_013710	faciogenital dysplasia homolog 2 (Fgd2)	148.34	15.53	452.38	54.22	3.05	0.01472
1439272_at	BB183240	Hcapg-pending; chromosome condensation protein G	55.93	13.65	170.59	14.27	3.05	0.003406
1447181_s_at	AI790233	solute carrier family 7 (cationic amino acid transporter, y+ system), member 7	177.22	20.21	540.97	55.48	3.05	0.012611
1417376_a_at	NM_018770	Igsf4	396.45	26.06	1203.76	96.53	3.04	0.005778
1418912_at	BB559706	plexin domain containing 2	94.44	20.22	286.88	41.36	3.04	0.029275
1436202_at	AI853644	AI853644	276.6	21.38	833.8	69.76	3.01	0.004291
1417392_a_at	NM_011405	solute carrier family 7 (cationic amino acid transporter, y+ system), member 7	430.33	20.57	1290.91	88.58	3	0.003804
1415800_at	M63801	gap junction membrane channel protein alpha 1 Gja1	54.62	4.59	163.02	28.66	2.98	0.025855
1435842_at	AI644670	AI644670	115.28	28.13	342.98	36.48	2.98	0.029785
1424877_a_at	BC018236	aminolevulinate, delta-, dehydratase (Alad)	222.66	23.18	648.3	28.3	2.91	0.001512
1429742_at	AK013119	chromosome condensation 1-like	85.32	13.48	247.52	24.39	2.9	0.003929
1437583_x_at	BB556915	acetyl-Coenzyme A synthetase 2 (AMP forming)-like	90.13	17.84	256.71	19.97	2.85	0.000361
1428116_a_at	BG093881	Dynein light chain	2464.04	122.5	6990.48	143.43	2.84	0.000108
1452664_a_at	AK010720	Transmembrane 7 superfamily member 3	246.66	18.26	700.1	35.3	2.84	0.001103
1417090_at	NM_009037	reticulocalbin 1	116.43	17.46	322.49	37.3	2.77	0.012893
1425191_at	BC019407	BC019407.1	331.93	34.98	918.05	29.22	2.77	0.000384
1455520_at	AV327200	est AV327200	140.78	13.77	386.75	12	2.75	0.000674
1424109_a_at	BC024663	glyoxalase 1	752.25	38.15	2060.94	47.01	2.74	0.00027
1440559_at	AV377334	est AV377334	146.34	16.75	397.39	15.64	2.72	0.001345
1421998_at	NM_023141	ATP-dependant interferon responsive Adir; torsin family 3, member A	322.84	22.45	872.62	32.37	2.7	0.000363
1429290_at	BE951971	neuronal pentraxin receptor	149.51	22.56	403.77	39.65	2.7	0.006281
1448361_at	BB833716	tetratricopeptide repeat domain 3	310.94	31.27	829.37	47.11	2.67	0.003929
1415996_at	AF173681	thioredoxin interacting protein; Txnip	1556.42	112.68	4133.01	511.07	2.66	0.022557
1436248_at	AW120749	AW120749	60.37	10.23	160.42	8.55	2.66	0.003178
1429296_at	BF465974	RAB10	816.62	79.96	2163.97	133.09	2.65	0.000425
1452679_at	AA986082	beta tubulin	72.73	6.52	192.25	12.43	2.64	0.002312
1424748_at	BC021504	UDP-N-acetyl-alpha-D-galactosamine:polypeptide N-acetylgalactosaminyltransferase 11	281.63	34.28	736.85	13.3	2.62	0.000593
1439032_at	BG069669	Tnfrsf19	142.84	16.48	374.89	30.62	2.62	0.003955
1453122_at	AK019549	AK019549.1	137.42	15.39	359.03	15.19	2.61	0.000936
1427797_s_at	BF580235	endogenous murine mink cell focus-forming (MCF) envelope protein	228.45	22.78	594.75	66.75	2.6	0.017699
1416617_at	NM_080575	acetyl-Coenzyme A synthetase 2 (AMP forming)-like; Acas2	196.52	24.35	507.41	21.16	2.58	0.001722
1429830_a_at	AK005507	CD59a antigen	132.32	11.87	337.51	11.94	2.55	0.001679
1448123_s_at	NM_009369	transforming growth factor beta induced; Tgfbi	826.21	76.73	2102.93	78.71	2.55	0.000256
1433695_at	BQ174762	BQ174762	1332.73	157.87	3383.91	220.82	2.54	0.012259
1437463_x_at	BB532080	Tgfbi	597.89	44.59	1508.6	112.86	2.52	0.002408
1419470_at	BI713933	guanine nucleotide binding protein beta 4; Gnb4	167.87	23.18	422.11	23.61	2.51	0.004913
1456250_x_at	BB533460	Tgfbi	498.19	40.08	1251.57	101.37	2.51	0.002748
1444546_at	BE133443	est BE133443	413.6	23.79	1027.79	76.99	2.48	0.002226
1426387_x_at	BB085906	similar to phosphatidylserine decarboxylase	1461.85	63.9	3606.21	219.64	2.47	0.001982
1435485_at	BE951647	BE951647	291.87	24.02	714.1	32.29	2.45	0.000896
1417538_at	NM_011895	CMP-sialic acid transporter 1	222.44	13.49	539.41	31.92	2.42	0.00233
1425436_x_at	U49865	killer cell lectin-like receptor, subfamily A, member 3	387.49	19	938.53	46.93	2.42	0.001638
1415871_at	NM_009369	Tgfbi	368.26	18.61	876.37	22.97	2.38	0.000338
1435748_at	AW911807	Guanine deaminase	438.62	38.5	1040.13	40.15	2.37	0.001492
1434975_x_at	AA673371	similar to phosphatidylserine decarboxylase	1970.3	77.34	4643.53	240.66	2.36	0.001411
1436944_x_at	BB504983	similar to phosphatidylserine decarboxylase	1908.84	82.6	4340.95	225.66	2.27	0.001572
1424714_at	BC008184	aldolase 3C	173.59	8.8	72.04	6.81	-2.41	0.004485
1415822_at	BG060909	stearoyl-Coenzyme A desaturase 2	2768.07	174.66	1139.89	56.98	-2.43	0.000936
1449453_at	AI647987	bone marrow stromal cell antigen 1	1551.67	68.43	639.61	62.99	-2.43	0.00079
1450424_a_at	AF110803	interleukin 18 binding protein	488.02	18.35	199.28	23.78	-2.45	0.002765
1417696_at	BG064396	sterol O-acyltransferase 1	3409.27	99.99	1357.22	176.17	-2.51	0.002142
1417826_at	BC012692	aldo-keto reductase E1	368.14	24.05	144.94	14.1	-2.54	0.003775
1427351_s_at	BB226392	immunoglobulin heavy chain 6	787.5	38.05	303.47	21.05	-2.59	0.000712
1444176_at	AV204216	prostaglandin E receptor 2 (subtype EP2); Ptger2	772.86	260.78	290.26	38.53	-2.66	0.004128
1449310_at	BC005440	Vacuolar proton pump D subunit	3112.2	59.68	1169.18	33.53	-2.66	0.003565
1437478_s_at	AA409309	EF hand domain containing 2	8000.07	205.08	3000.63	413.06	-2.67	0.001304
1416871_at	NM_007403	a disintegrin and metalloprotease domain 8; Adam8	7033.57	275.19	2587.15	231.93	-2.72	0.000956
1449324_at	BM234652	ERO1-like	4549.45	558.25	1672.21	162.97	-2.72	0.009999
1450148_at	NM_134160	mucolipin 3	474.43	35.31	174.51	20.58	-2.72	0.007581
1448182_a_at	NM_009846	CD24a antigen	1394.33	46.46	509.85	63.81	-2.73	0.000725
1450718_at	NM_018825	adaptor protein with pleckstrin homology and src homology 2 domain; Aps-pending	484.97	18.17	177.16	17.62	-2.74	0.001546
1420911_a_at	NM_008594	milk fat globule-EGF factor 8 protein; Mfge8	7842	227.64	2855.5	266.97	-2.75	0.000912
1449401_at	NM_007574	complement component 1, q subcomponent, gamma polypeptide; C1q	5796.61	338.29	2092.15	380.17	-2.77	0.013188
1419321_at	NM_010172	coagulation factor VII	2681.51	186.47	964.4	126.38	-2.78	0.002381
1426600_at	BM209618	facilitated glucose transporter 1	3658.82	360.97	1314.39	181.47	-2.78	0.008734
1433918_at	BB175634	APG4 (ATG4) autophagy-related homolog D	660.61	21.52	234.94	33.57	-2.81	0.001568
1417293_at	NM_015818	heparan sulfate 6-O-sulfotransferase 1 Hs6st1	836.96	45.26	295.36	22.48	-2.83	0.001311
1415823_at	BG060909	stearoyl-Coenzyme A desaturase 2	955.92	76.44	333.4	24.35	-2.87	0.002797
1421031_a_at	NM_023516	Hypoxia-inducible 2; Hig2	4495.56	210.61	1555.26	262.79	-2.89	0.002171
1426599_a_at	BM209618	facilitated glucose transporter 1	2322.04	313.49	802.95	150.18	-2.89	0.013534
1416034_at	NM_009846	CD24a antigen	958.06	34.34	329.79	41.08	-2.91	0.000343
1456874_at	BB817332	fibronectin leucine rich transmembrane protein 2	253.39	27.06	85.1	16.44	-2.98	0.007111
1449049_at	AF316985	toll-like receptor 1; Tlr1	306.42	27.12	101.36	13.38	-3.02	0.003474
1424111_at	BG092290	insulin-like growth factor 2 receptor; Igf2r	1939.43	56.45	634.94	32.58	-3.05	0.000153
1436520_at	BB378317	est AI450948	2323.01	61.89	751.92	69.1	-3.09	0.000324
1451206_s_at	BC007144	cytohesin binding protein; Cbp	866.02	83.3	278.87	39.13	-3.11	0.003259
1429524_at	AK021181	CD24a antigen	529.38	90.97	169.6	245.22	-3.12	0.035933
1437502_x_at	BB560574	myosin IF	2586.57	73.07	829.54	36.29	-3.12	0.006743
1434600_at	BB758095	tight junction protein 2; Tjp2	306.94	18.73	96.81	17.41	-3.17	0.004528
1436506_a_at	AW988981	AW988981	923.01	175.29	291.59	35.19	-3.17	0.027615
1424112_at	BG092290	insulin-like growth factor 2 receptor; Igf2r	1127.63	29	351.97	26.69	-3.2	0.000382
1455082_at	AW545867	Casitas B-lineage lymphoma b	1423.69	82.71	445.04	26.69	-3.2	0.001038
1460466_at	BB824055	BB824055	607.26	45.38	186.95	21.48	-3.25	0.002822
1439422_a_at	AV048291	AV048291	327.85	18.13	100.12	19.44	-3.27	0.002181
1435697_a_at	BB503614	cytohesin binding protein; Cbp	1013.46	123.81	307.54	39	-3.3	0.006343
1417398_at	NM_025846	related RAS viral (r-ras) oncogene homolog 2; Rras2	387.5	24.28	113.03	12.67	-3.43	0.002673
1425336_x_at	BC011306	H2-K1	8959.81	174.34	2609.04	186.72	-3.43	0.0003
1419635_at	BG067119	NM_026127.1	142.87	18.08	40.66	9.46	-3.51	0.00309
1450619_x_at	NM_020612	cell matrix adhesion regulator; Cmar	313.58	39.87	88.97	30.67	-3.52	0.010368
1418648_at	BB284358	EGL nine homolog 3 Egln3	2248.26	267.84	636.37	163.48	-3.53	0.006424
1460302_at	AI385532	thrombospondin 1	278.71	33.03	78.87	13.34	-3.53	0.004516
1418649_at	BB284358	EGL nine homolog 3	2193.11	213.3	618.99	121.32	-3.54	0.005654
1424613_at	BC020004	G protein-coupled receptor (Raig2)	662.82	84.45	187.11	24.47	-3.54	0.009436
1452865_at	AK009798	Leucine rich repeat containing 27	564.84	20.76	158.23	18.31	-3.57	0.000452
1419030_at	BM234652	ERO1-like	2770.35	362.82	753.9	112.49	-3.67	0.009724
1418949_at	NM_011819	growth differentiation factor 15; Gdf15	4893.15	546.88	1325.66	168.62	-3.69	0.009043
1448260_at	NM_011670	ubiquitin carboxy-terminal hydrolase L1; Uchl1	259.32	44.15	70.21	11.36	-3.69	0.027807
1436530_at	AA666504	similar to proteinase inhibitor wdnm1	7384.45	280	1997.56	225.37	-3.7	0.001237
1453109_at	AK013194	Arylsulfatase K	227.26	18.83	61.22	9.92	-3.71	0.002971
1420664_s_at	NM_011171	protein C receptor	1616	243.88	423.34	37.76	-3.82	0.018335
1442024_at	BB328892	BB328892	299.35	21.16	78.32	17.92	-3.82	0.004139
1422760_at	NM_011061	peptidyl arginine deiminase type IV; Pdi4	181.96	16.66	47.29	14.69	-3.85	0.014643
1441937_s_at	AV371921	AV371921	771.88	50.64	199.69	37.84	-3.87	0.003434
1441625_at	BQ174470	BQ174470	441.36	27.07	109.72	46.3	-4.02	0.009858
1436538_at	AV084342	Lrp2bp	803.42	152.37	199.38	55.06	-4.03	0.019143
1451006_at	AV286265	xanthine dehydrogenase	2287.41	54.14	550.33	34.43	-4.16	6.2e-05
1422426_at	NM_020612	cell matrix adhesion regulator; Cmar	356.71	25.01	82.05	21.23	-4.35	0.003501
1442944_at	BG065699	est BG065699	207.35	15.59	46.48	11.7	-4.46	0.004431
1417697_at	BG064396	sterol O-acyltransferase 1	2431.34	168.66	542.94	66.2	-4.48	0.001617
1426607_at	BG068672	BB668066	148.03	26.11	33.06	8.11	-4.48	0.018531
1429637_at	AK008987	AK008987.1	344.81	42.01	76.74	25.36	-4.49	0.010099
1452592_at	AV066880	microsomal glutathione S-transferase 2	402.32	35.27	89.44	25.27	-4.5	0.006291
1420052_x_at	C81484	proteasome subunit, beta type 1	620.79	30.84	132.32	72.33	-4.69	0.00826
1427127_x_at	M12573	heat shock protein 68	620.04	153.95	129.54	38.24	-4.79	0.030852
1450387_s_at	NM_009647	adenylate kinase 4; Ak4	640.01	104.89	129.78	49.19	-4.93	0.007197
1449305_at	NM_007972	coagulation factor X (F10)	745.25	99.49	147.24	34.89	-5.06	0.011784
1448550_at	NM_008489	lipopolysaccharide binding protein; Lbp	368.96	35.88	72.48	20.29	-5.09	0.002527
1439059_at	BB709811	BC031748	124.28	28.67	23.96	4.76	-5.19	0.041595
1421811_at	AI385532	thrombospondin 1	466.4	72.04	89.76	15.94	-5.2	0.006702
1437540_at	AV313762	mucolipin-3	493.91	39.17	93.96	20.29	-5.26	0.003343
1422470_at	NM_009760	BCL2/adenovirus E1B 19kDa-interacting protein 1, NIP3 (Bnip3)	3839.51	294.39	699.28	128.94	-5.49	0.001844
1434585_at	BB667130	fibrillarin	514.88	34.86	93.52	13.72	-5.51	0.001017
1420909_at	NM_009505	vascular endothelial growth factor A	806.45	185.99	145.65	57.95	-5.54	0.019821
1419029_at	BM234652	ERO1-like	3749	587.24	651.35	107.58	-5.76	0.013921
1428909_at	C85657	BI683916	682.39	132.39	117.68	25.04	-5.8	0.01473
1438511_a_at	BB408123	Response gene to complement 32	269.79	61.59	44.93	12.88	-6	0.032568
1426324_at	M33151	MHC H2-L-d	1826.16	111.26	298.79	54.39	-6.11	0.000921
1449141_at	BG070068	Filamin binding LIM protein 1	2096.64	77.2	329.04	45.65	-6.37	0.00011
1437304_at	AV276986	Casitas B-lineage lymphoma b	1082.71	84.45	159.32	23.19	-6.8	0.001515
1434366_x_at	AW227993	C1q beta	6568.86	204.53	963.52	247.88	-6.82	0.000996
1418689_at	NM_021445	cathepsin 6	364.24	25.7	52.45	19.89	-6.94	0.002179
1430979_a_at	AK011963	peroxiredoxin 2	334.52	19.15	45.69	15.72	-7.32	0.001608
1425234_at	BE945716	Collagen XX	721.02	48.46	96.25	26.81	-7.49	0.002371
1450652_at	NM_007802	cathepsin K	2056.96	281.03	272.7	42.25	-7.54	0.009337
1452388_at	AW763765	heat shock protein 70-3	466.15	131.79	60.46	18.96	-7.71	0.037348
1455257_at	AV352983	est AV352983	1467.85	52.87	190.3	40.47	-7.71	0.000307
1424832_at	BC019814	CD300e	1588.32	173.78	203.65	17.02	-7.8	0.003626
1458469_at	BB205662	Casitas B-lineage lymphoma b	584.45	47.41	74.88	31.45	-7.81	0.002447
1438937_x_at	AI385586	est AI385586	261.66	20.83	33.22	9.55	-7.88	0.002384
1427126_at	M12573	heat shock protein 70-1	444.81	126.08	56.31	22.3	-7.9	0.037043
1452705_at	AK004611	N-terminal Asn amidase (Ntan1)	658.46	30.51	79.7	21.25	-8.26	0.000703
1428018_a_at	AF251705	polymeric immunoglobulin receptor 5 precursor; Pigr5	3829.82	143.18	441.65	69.18	-8.67	0.000111
1456578_x_at	BB260833	LIM and SH3 protein 1; Lasp1	2760.75	127.47	307.85	49.45	-8.97	0.000405
1454838_s_at	BB323985	BB323985	493.71	94.02	51.97	10.84	-9.5	0.016453
1449193_at	NM_009690	CD5 antigen-like	10415.4	203.44	1079.81	137.41	-9.65	7.4e-05
1437726_x_at	BB111335	complement component 1, q subcomponent, beta polypeptide	5417.65	240.36	550.59	132.71	-9.84	0.000765
1417063_at	NM_009777	complement component 1, q subcomponent, beta polypeptide	6778.97	311.62	671.51	207.15	-10.1	0.001205
1423487_at	BB775592	Cript-pending	206.99	19.36	20	0	-10.35	0.001966
1418569_at	BG070068	Filamin binding LIM protein 1	1037.72	64.58	96.52	17.91	-10.75	0.000389
1451931_x_at	M69068	H2-D1	8319.78	193.08	674.57	368.13	-12.33	0.000432
1421144_at	NM_023879	retinitis pigmentosa GTPase regulator interacting protein 1; Rpgrip1	596.73	56.45	46.57	14.9	-12.81	0.002172
1447100_s_at	C80506	est C80506 /DB_XREF=gi:2520836 /DB_XREF=C80506 /CLONE=J0083B11 /FEA=EST /CNT=2 /TID=Mm.200204.1 /TIER=ConsEnd /STK=2 /UG=Mm.200204 /LL=97083 /UG_GENE=C80506 /UG_TITLE=expressed sequence C80506	575.57	138.14	43.93	23.14	-13.1	0.025842
1426289_at	BC006738	BC006738.1	1244.55	24.75	90.7	22.04	-13.72	3.1e-05
1418536_at	M29881	Histocompatibility 2, Q region locus 7 (H2-Q7)	326.29	32.33	20	0	-16.31	0.002351
1419764_at	NM_009892	chitinase 3-like 3	1998.95	69.75	107.8	46.36	-18.54	0.000148
1424784_at	AV047635	BC024323.1	503.22	86.64	20.24	1.93	-24.86	0.010105
1423322_at	BQ176612	lin 7 homolog c	712.69	101.93	20.57	3.76	-34.65	0.006077
1419549_at	NM_007482	arginase 1	3756.2	303.88	90.46	74.11	-41.52	0.000885
1441113_at	BB205989	BB205989	1566.96	197.59	20.37	13.94	-76.93	0.004188
